# Supplementary material
Source: HighWire-hosted journal article supplement (https://genome.cshlp.org/content/suppl/2007/06/18/17.6.746)

## Supplementary Online Text

### *Transcription-induced chimeras*

We identified 136 loci (110 if we removed the target loci that are in gene clusters) with RACE extensions reaching exons of upstream loci (i.e. having RACEfrags overlapping upstream exons), thus creating transcripts that possibly encode chimeric versions of already annotated proteins. Often chimeric transcripts are tissue specific (45%, 51 out of 110 loci not part of gene clusters), but when chimeras for a given locus are detected in several tissues (chimeras are detected on average in 2.9 tissues/cell lines out of 15), they are preponderantly similar (an example is illustrated in Figure 3) and link the same two loci (49% of the loci for which we identified a chimera in multiple tissues exhibit only one type of chimera, 29 out of 59 loci). We have identified by RACEfrags a total of 155 different transcription-induced chimeras (1.4 chimeras per locus). Most of them link 2 loci (79%, 123/155), but some are linking 3, 4 or even 5 loci together (17.5%, 2% and 1.5% respectively). Remarkably, some genes tend to be incorporated in different chimeras (two on average); 174 unique genes are linked into the 155 chimeras, which contain 249 genes. 13 chimeras were validated by sequencing (11 of them linking adjacent loci, and 2 skipping other loci). Only one of these incorporates a novel exon, while the others only link known exons of the fused loci together.

### *Sequence features of the novel RACEfrags*

The vast majority of the 225 novel exons are interrogated by the ENCODE tiling array over more than 50% of their length (Figure S1). As expected some do not overlap RACEfrags because they map to repeat-masked regions not present on the tiling chip, or because they are too short and GC poor. It is important to emphasize that the ENCODE Affymetrix tiling array comprises 14,707,189 bp from the non-repeated portion of the 44 ENCODE regions (49% of the entire ENCODE sequences){Consortium, 2007 #739}. As expected a limited subset (5%) of novel exons does not overlap RACEfrags but only RT-PCRfrags (probes hybridized by the RT-PCR reactions to check connectivity, see above and Figure 1).

The 57 novel internal (the first and the last exons of the RT-PCR products were not considered) exons have an average and median length of 149 and 118 bp, respectively (Figure S3A), a size comparable to the average and median size (145 and 122 bp, respectively) of internal exons reported by the human genome consortium {Lander, 2001 #57}, or the richer GENCODE annotation (177 and 124 bp, respectively). Interestingly, we observe that the pool of novel exons is significantly enriched in short exons (<60 bp;  $p < 0.001$ ; see Figure S3A). They have a decreased average (49.7%) and median (49.5%) GC content than those reported for GENCODE annotated exons (average: 53.5% and median: 54.1%; see Figure S3B). 146 novel introns were identified from the RT-PCR sequences. They have an average and median lengths of 32 kb and 12.3 kb, respectively, far above the 4.6 kb and 0.9 kb recorded for GENCODE annotated introns {Harrow, 2006 #726}. This bias towards long introns was expected, because we preferentially targeted distal extensions found by RACEfrags. Noticeably, 11% (16 out of 146) of the novel introns harbor non-canonical splice sites, a proportion much higher than that reported by the whole GENCODE annotation (most of those introns have one annotated canonical splice site and one novel non canonical splice site). Nevertheless, 14% (20/146) of these new introns are supported by ESTs, most of them submitted after the GENCODE annotation release. Considering only the entirely novel exons (i.e. not a single nucleotide overlapping an already annotated exon) and both splice sites novel: 90 donors (89 canonical) and 48 acceptors (all canonical) were scored according to the human splice site substitution matrices (see Supplementary Online Materials and Methods section) and compared to the scores of GENCODE splice sites and false splice sites (Figure S4). The novel acceptors have higher scores than false acceptors (random AG;  $p < 2.2e-16$ ), in the range of GENCODE UTR acceptors ( $p = 0.6241$ ), and slightly lower than those of GENCODE CDS acceptors ( $p = 0.04716$ ). Similarly, novel donors score higher than false donors (random GT) ( $p < 2.2e-16$ ), but as well as both GENCODE UTR and GENCODE CDS donors ( $p = 0.6041$  and  $p = 0.1070$ , respectively). In summary, the novel splice sites score as well as annotated UTR splice sites.

## Supplementary Online Materials and Methods

### *RACE/array analysis of known protein-coding genes.*

5'-RACEs were performed on polyA<sup>+</sup> RNAs from 12 human tissues (brain, heart, kidney, spleen, liver, colon, small intestine, muscle, lung, stomach, testis, placenta, all BD Clontech) and 3 cell lines (GM06990, HL60 and HeLaS3) using the BD SMART<sup>TM</sup> RACE cDNA amplification kit (BD Clontech Cat. No.634914). Double-stranded cDNA synthesis, adaptor ligations to the synthesized cDNA and 25 µl final volume RACE reactions were performed according to the manufacturers' instructions. RACE oligonucleotides were designed with primer 3 ([http://frodo.wi.mit.edu/cgi-bin/primer3/primer3\\_www.cgi](http://frodo.wi.mit.edu/cgi-bin/primer3/primer3_www.cgi)) with the following parameters:  $23 \leq \text{primer size} \leq 27$ , optimal size=25,  $68^{\circ}\text{C} \leq \text{primer } T_m \leq 72^{\circ}\text{C}$ , optimal  $T_m = 70^{\circ}\text{C}$ ,  $50\% \leq \text{primer GC percentage} \leq 70\%$ . 15 µl aliquots of 80 to 100 RACE reactions performed with oligonucleotides specific to non-neighboring genes and on the same tissue/cell line cDNA were assembled in pools, precipitated with ethanol and resuspended in water. 25 µg of RACE amplicons were fragmented with DNase I to the size of 50-100 bp, denatured by heating to 99°C for 10 minutes and end labeled with biotin using terminal transferase (TdT; Roche) in 35 µl under the following conditions: 1X TdT reaction buffer (Roche), 2.5 mM CoCl<sub>2</sub>, 1.15 nmoles of Affymetrix DNA Labeling Reagent (DLR, cat. # 900542) per 1 µg of fragmented DNA and 200 units of TdT. The reactions were incubated for 2 hrs at 37°C. 20 µg of labeled RACE DNA was hybridized to ENCODE tiling arrays as described in (Kapranov et al. 2005). RACE maps were generated using Tiling Analysis Software (TAS, <http://www.affymetrix.com/support/developer/downloads/TilingArrayTools/index.affx>). The maps were generated with no smoothing (bandwidth = 1) and no CEL file normalization. The RACEfrags were generated using probe intensity threshold of 100; maxgap = 30 and minrun = 20. Thus, minimal RACEfrag would contain two consecutive positive probes.

### *RT-PCR of RACEfrags*

538 RACEfrags were selected for independent verification of their connectivity with the original annotated gene: (set 1) 255 RACEfrags corresponding to the longest extension in a tissue; (set 2a) 120 of these distal RACEfrags which are supported in at least two tissues (if not in set 1); (set 2b) 40 RACEfrags which appear most frequently in the highest number of tissues (if not in set 2a); (set 3) 90 RACEfrags which correspond to the second longest tissue-specific extension; and (set 4) 33 intronic RACEfrags. RT-PCR to verify these 538 RACEfrags were done either in Affymetrix Inc., Santa Clara (lab.A 282 RACEfrags) or the Universities of Geneva and Lausanne, Switzerland (lab.B 300 RACEfrags, 40 overlaps). RT-PCRs in lab B were performed on the oligo dT-primed cDNA using BD-advantage II polymerase mix and following the manufacturers' instructions (25 ul final volume). Note that the RNA used was the same as for the RACE reaction in which the RACEfrag was identified. The right primer was the original RACE primer and the left primer was designed with the same characteristics (see above) in the RACEfrag to be verified. ENCODE tiling arrays were used as a readout of the RT-PCR reactions. 15 ul aliquots of RT-PCR reactions were assembled in pools which contained a single reaction per ENCODE region. Pools of RT-PCR reactions were ethanol precipitated, resuspended in water, labeled and hybridized to the microarray as described above to control the connectivity between the RACEfrags and the original exon chosen to design the RACE oligonucleotide.

Of the 300 RACEfrags, oligonucleotides could only be selected for 283 by lab A. The 283 reactions in lab A were performed using gene-specific oligonucleotides for cDNA synthesis. cDNA synthesis was conducted on 10 ng of polyA<sup>+</sup> RNA from a tissue where a corresponding RACEfrag was detected using the same oligonucleotide as used for 5' RACE analysis. The cDNA synthesis was performed with Thermoscript reverse transcriptase (Invitrogen) using the same conditions as described in (Kapranov et al. 2005) for 5' RACE cDNA synthesis. The cDNA reactions were purified using QIAquick 96 (Qiagen) and ½ of each purified reaction was used as a starting material for RT-PCR. For each RACEfrag, two rounds of nested RT-PCR reactions were performed. The products of first round of RT-PCR were purified using QIAquick 96 system, eluted in 80 µl and 0.01 µl of the first round reaction was used for the second round RT-PCR. Each

round of amplification consisted of 30 cycles of PCR (94°C for 20 sec; 60°C for 30 sec; 72°C for 2 min) followed by 10 min at 72°C. Products of the final round of RT-PCRs were purified using QIAquick 96, pooled using the same strategy as in the lab B and hybridized to ENCODE arrays as described above.

In addition, RT-PCR reactions for 96 RACEfrags in lab A were done using oligo-dT cDNA as a substrate. PolyA<sup>+</sup> RNA from brain, colon, heart, kidney, liver, lung and muscle were pooled and used for cDNA synthesis following the procedure used for cDNA synthesis for 3'RACE described in (Consortium 2007). The resulting cDNA was used for RT-PCR following the same PCR conditions as above. The RT-PCRfrags were generated using the same parameters as the 5' RACEfrags for the known genes (see above) for both sets (Labs A & B).

#### *Assignment of RT-PCRfrags*

To score an RT-PCR as positive based on the profile of microarray hybridization, we used a two-way approach. First, an RT-PCR reaction was considered as positive if RT-PCRfrags could be found within 1 kb from both forward and reverse RT-PCR primer. 33% of the reactions were positive following this criterion. A separate scoring strategy was used on the reactions that did not pass this filter to account for the cases where an RT-PCR oligonucleotide was picked close to the boundary of the target RACEfrag or the target exon, thus resulting in the absence of RT-PCRfrags immediately proximal to the primer position: if 3 or more of the RT-PCR frags were overlapping the original RACEfrags from the tissue where the RT-PCR was performed, the reaction was recalled positive. Using both scoring strategies combined, about 58% of RT-PCRs were scored positive.

#### *Cloning and Sequences of the RACE/array products*

Two different strategies were employed to sequence the amplified transcripts that link tested RACEfrags and known exons. The RT-PCR reactions that appeared as single bands on agarose gel were selected for direct sequencing, while the others were cloned

into pDRIVE following manufacturer's instructions (Qiagen) before sequencing of a minimum of eight clones. The reads were assembled after masking of the vector and mapped to the human genome using exonerate (unmasked, max intron length=1.5 Mb) to identify the best hit. The hit has to be more than 100 bp long, and with a %identity greater than 95%. From 2354 assembled sequences, 703 were spliced and mapped in the right target, corresponding to 353 non-redundant sequences (when several sequences were identical or included in each other, only one representative was kept). The following two filtering steps were applied to remove truncated sequences and those not reaching the borders of the target regions (the cloning could lead to a partial loss of the insert). First, at least 90% of the genomic span of a target region has to be covered by the RT-PCR sequence. Secondly, the RT-PCR sequence must not extend further than 100 bp outside the target genomic span. After these filtering steps, 175 unique sequences remained. They are deposited in GenBank under accession numbers DQ655905-DQ656069 and EF070113-070122. They were inspected manually by the annotators who provided the GENCODE annotation (Harrow et al. 2006) and dubious mappings were discarded, leading to a final set of 132 unique sequences. They correspond to 89 RT-PCR reactions and 69 loci. Note that the GENCODE annotation team gold standards to accept transcript sequences as evidence are conservative. For example they reject most of the transcripts with non-canonical splice sites. It is therefore possible that more sequences correspond to *bona fide* RT-PCR products, but that they escaped further analysis because they present some characteristics that are different from the ones harbor by known transcripts. Detailed information about the 132 sequences is available in Table S2, which provides links to the UCSC browser for vizualisation (available on line at [http://genome.imim.es/GENCODE/RACEdb/Sequences\\_Description.html](http://genome.imim.es/GENCODE/RACEdb/Sequences_Description.html)).

#### *Overlaps of RACEfrags with other datasets: RACEfrags from 12 tissues*

The RACEfrags were overlapped with 5'end related datasets produced by the ENCODE consortium: TSS 5'end clusters derived from CAGE (5'-specific Cap Analysis Gene Expression) tags and 5'PETs (Paired-End 5' and 3' di-Tags), composite promoters derived from ChIP-on-chip hits and DNase I Hypersensitive sites (Hss) (Consortium

2007).

Four sets of RACEfrags were used:

1. 1390 projected RACEfrags from 12 tissues (on which the RT-PCR were performed) external to the locus, not yet annotated as 5' ends (i.e not overlapping annotated first exons): they represent a mixture of 5'ends and internal new exons.
2. 60 RACEfrags corresponding to the subset of the 1390 RACEfrags that are in the set of sequenced exons (obtained by RT-PCR followed by cloning and sequencing) from the considered experiment and not yet annotated as 5'ends.
3. 584 RACEfrags corresponding to the RACEfrags that are the most distal for each locus per tissue were extracted: this set (subset of the set of 1390 RACEfrags) does not necessarily contain only 5'ends because the length of the ENCODE regions and the distance between genes in the pools limit the size of the observable extensions, and also because of the conservative filtering of RACEfrags, that could have discarded the most distal ones. However, it is likely to be enriched in 5'ends compared to the previous set.
4. 31 RACEfrags corresponding to the subset of 584 RACEfrags that are in the set of sequenced exons (obtained by RT-PCR followed by cloning and sequencing) from the considered experiment and not yet annotated as 5'ends.

The percentages of RACEfrags having 1bp overlap with the other sets (stranded when the dataset contained a strand information) were calculated for the three RACEfrags sets as well as for random sets (100 random sets mimicking each of the sets) to compare the random overlap to the observed overlap. All overlaps are significant (P-values<0.01) except the overlap of the 60 RACEfrags with TSS for which the P-value is 0.06 (Figure 6).

#### *Overlaps of RACEfrags with other datasets: HL60 RACEfrags*

All HL60 RACEfrags not yet annotated as first exons (791) were overlapped with ChIP-on-chip hits (Consortium 2007) obtained from HL60 cell line, using the same Affymetrix chips as were used for RACEfrags. The ChIP-on-chip hits coordinates were downloaded at the UCSC genome browser (<http://genome.ucsc.edu/encode/>), they correspond to the following tracks:

1. Brg1 retinoic acid-treated HL-60, 0hrs (Brahma-related Gene 1)
2. CEBPe retinoic acid-treated HL-60, 0hrs (CCAAT-enhancer binding protein-epsilon)
3. CTCF retinoic acid-treated HL-60, 0hrs (CCTC binding factor)
1. H3K27me3 retinoic acid-treated HL-60, 0hrs (Histone H3 tri-methylated lysine 27)
2. H4Kac4 retinoic acid-treated HL-60, 0hrs (Histone H4 tetra-acetylated lysine)
3. P300 retinoic acid-treated HL-60, 0hrs (E1A-binding protein, 300-KD)
4. PU1 retinoic acid-treated HL-60, 0hrs (Spleen focus forming virus proviral integration oncogene)
5. Pol2 8WG16 antibody, retinoic acid-treated HL-60, 0hrs (RNA Polymerase II, 8WG16 ab against pre-initiation complex form)
6. RARA retinoic acid-treated HL-60, 0hrs (Retinoic Acid Receptor-Alpha)
7. SIRT1 retinoic acid-treated HL-60, 0hrs (Sirtuin-1)
8. H3K9K14ac2, retinoic acid-treated HL-60, 0hrs Strict Sites (Histone H3 K9 K14 Di-Acetylated)
9. H4Kac4, retinoic acid-treated HL-60, 0hrs Strict Sites (Histone H4 tetra-acetylated lysine)
10. Pol2, retinoic acid-treated HL-60, 0hrs Strict Sites (RNA Polymerase II, 8WG16 ab against pre-initiation complex form)
11. actinomycin-D treated p63 HL-60 Strict Sites (p63 with actinomycin D treatment)
12. p63, HL-60 Strict Sites (p63 without actinomycin D treatment )

The proportion of RACEfrags overlapping the hits on at least one base pair was compared to the overlap obtained from a set of randomly distributed RACEfrags mimicking HL60 RACEfrags in order to calculate the significance of the overlaps (Figure 7).



### Supplementary Online References:

- The ENCODE Consortium. 2007. The ENCODE pilot project: Identification and analysis of functional elements in 1% of the human genome. *Nature* submitted.
- Harrow, J., F. Denoeud, A. Frankish, A. Reymond, C.K. Chen, J. Chrast, J. Lagarde, J.G. Gilbert, R. Storey, D. Swarbreck, C. Rossier, C. Ucla, T. Hubbard, S.E. Antonarakis, and R. Guigo. 2006. GENCODE: producing a reference annotation for ENCODE. *Genome Biol* 7 Suppl 1: S4 1-9.
- Kapranov, P., J. Drenkow, J. Cheng, J. Long, G. Helt, S. Dike, and T.R. Gingeras. 2005. Examples of the complex architecture of the human transcriptome revealed by RACE and high-density tiling arrays. *Genome Res* 15: 987-997.

Table S1 : Description of the transcripts obtained by sequencing of RT-PCR products on RACEfrags

| Transcript structure               | Among 132 RT-PCR sequences obtained  |                                                                    |                                                          |                                                                                                  | Among 69 loci with RT-PCR sequence(s) obtained * |                                                         |                                                   |                                                                                           |
|------------------------------------|--------------------------------------|--------------------------------------------------------------------|----------------------------------------------------------|--------------------------------------------------------------------------------------------------|--------------------------------------------------|---------------------------------------------------------|---------------------------------------------------|-------------------------------------------------------------------------------------------|
|                                    | Number of (re) annotated transcripts | Number of transcripts (re)annotated as Coding (a CDS was assigned) | Number of transcripts with Novel CDS assigned (% of all) | Number of transcripts for which a potential new CDS is detected but was not annotated (% of all) | Number of loci with (re) annotated transcripts   | Number of loci with transcripts (re)annotated as Coding | Number of loci with Novel CDS assigned (% of all) | Number of loci for which a potential new CDS is detected but was not annotated (% of all) |
| <b>Only new internal exons</b>     | 15                                   | 5                                                                  | 1 (6.7%)                                                 | 6 (40%)                                                                                          | 15                                               | 5                                                       | 1 (6.7%)                                          | 5 (33.3%)                                                                                 |
| <b>Extension of the first exon</b> | 24                                   | 17                                                                 | 1 (4.2%)                                                 | 3 (12.5%)                                                                                        | 18                                               | 14                                                      | 1 (5.6%)                                          | 3 (16.7%)                                                                                 |
| <b>New 5' exons (not chimeric)</b> | 65                                   | 23                                                                 | 8 (12.3%)                                                | 35 (53.8%)                                                                                       | 34                                               | 18                                                      | 7 (20.6%)                                         | 16 (47.1%)                                                                                |
| <b>Chimeric transcripts</b>        | 28                                   | 15                                                                 | 14 (50%)                                                 | 6 (21.4%)                                                                                        | 13                                               | 7                                                       | 6 (46.1%)                                         | 3 (23.1%)                                                                                 |
| <b>Total*</b>                      | 132                                  | 60                                                                 | 24 (18.2%)                                               | 50 (37.9%)                                                                                       | 69                                               | 40                                                      | 16 (23.2%)                                        | 25 (36.2%)                                                                                |

Table S2 : description of the 132 sequences obtained from RT-PCR followed by cloning and sequencing.  
(This table is also available at [http://genome.imim.es/GENCODE/RACEdb/Sequences\\_Description.html](http://genome.imim.es/GENCODE/RACEdb/Sequences_Description.html))

| RT-PCR ID                                         | Locus ID | Gencode locus ID | Internal sequence ID | Genbank AC | (re)annotated Gencode transcript ID | RT-PCR set | Extension length (from RACEfrags) | Structure of the (re) annotated transcript | Type of the (re)annotated transcript | Novel CDS annotated                      | Potential new CDS (identified by automatic pipeline) | Novel exons ?   |
|---------------------------------------------------|----------|------------------|----------------------|------------|-------------------------------------|------------|-----------------------------------|--------------------------------------------|--------------------------------------|------------------------------------------|------------------------------------------------------|-----------------|
| <a href="#">5RACE208_chr19_59847174_59847202</a>  | LILRB4   | AC011515.1       | UGL10a09             | DQ655905   | AC011515.1-010                      | 2ab        | 18217                             | New exons upstream (not chimeric)          | Coding                               | No                                       | New M (ATG) upstream                                 | yes, not coding |
| <a href="#">5RACE179_chr21_32906405_32906494</a>  | TCP10L   | AP000274.7       | UGLsupplB            | DQ656039   | AP000274.7-004                      | 1          | 26780                             | chimeric                                   | Coding                               | Yes (links CDS of the two adjacent loci) | continuous ORF (entirely open)                       | no              |
| <a href="#">5RACE179_chr21_32906301_32906360</a>  | TCP10L   | AP000274.7       | Affy08248C06         | DQ655906   | AP000274.7-004                      | 2a         | 26646                             | chimeric                                   | Coding                               | Yes (links CDS of the two adjacent loci) | continuous ORF (entirely open)                       | no              |
| <a href="#">5RACE179_chr21_32906301_32906360</a>  | TCP10L   | AP000274.7       | UGL9b12              | DQ655908   | AP000274.7-005                      | 2a         | 26646                             | chimeric                                   | Coding                               | Yes (links CDS of the two adjacent loci) | continuous ORF (entirely open)                       | no              |
| <a href="#">5RACE179_chr21_32901846_32901892</a>  | TCP10L   | AP000274.7       | Affy08252B09         | DQ655909   | AP000274.7-006                      | 2b         | 22178                             | chimeric                                   | Coding                               | Yes (links CDS of the two adjacent loci) | continuous ORF (entirely open)                       | no              |
| <a href="#">5RACE179_chr21_32901846_32901892</a>  | TCP10L   | AP000274.7       | UGL9a11              | DQ655910   | AP000274.7-004                      | 2b         | 22178                             | chimeric                                   | Coding                               | Yes (links CDS of the two adjacent loci) | continuous ORF (entirely open)                       | no              |
| <a href="#">5RACE318_chr5_142057771_142057784</a> | FGF1     | AC005370.1       | Affy08248A11         | DQ655914   | AC005370.1-006                      | 2ab        | 14                                | extension of the first exon                | Coding                               | No                                       |                                                      | no              |
| <a href="#">5RACE318_chr5_142057771_142057784</a> | FGF1     | AC005370.1       | Affy08248D11         | DQ655915   | AC005370.1-010                      | 2ab        | 14                                | extension of the first exon                | Coding                               | yes (exon skipped)                       |                                                      | no              |
| <a href="#">5RACE318_chr5_142057771_142057784</a> | FGF1     | AC005370.1       | UGL16a06             | DQ655916   | AC005370.1-011                      | 2ab        | 14                                | extension of the first exon                | Not coding                           | No                                       |                                                      | no              |
| <a href="#">5RACE318_chr5_142057771_142057784</a> | FGF1     | AC005370.1       | UGL16c06             | DQ655917   | AC005370.1-012                      | 2ab        | 14                                | extension of the first exon                | Not coding                           | No                                       |                                                      | no              |
| <a href="#">5RACE318_chr5_142057771_142057784</a> | FGF1     | AC005370.1       | UGL16d06             | DQ655918   | AC005370.1-003                      | 2ab        | 14                                | extension of the first exon                | Not coding                           | No                                       |                                                      | no              |

|                                                                      |              |               |             |          |                   |     |      |                                   |            |                                   |                                             |                          |
|----------------------------------------------------------------------|--------------|---------------|-------------|----------|-------------------|-----|------|-----------------------------------|------------|-----------------------------------|---------------------------------------------|--------------------------|
| <a href="#">5RACE369 chr7 115906409</a>                              | MET          | AC002543.3    | UGL369-F-G5 | DQ656040 | AC002543.3-005    | 2ab | 1    | intronic                          | Coding     | Yes (new internal exon)           |                                             | yes, partly coding (ATG) |
| <a href="#">5RACE027 chrX 122819563</a><br><a href="#">122819627</a> | STAG2        | RP11-517O1.1  | UGL1a10     | DQ655919 | RP11-517O1.1-020  | 1   | 382  | New exons upstream (not chimeric) | Coding     | No                                |                                             | yes, not coding          |
| <a href="#">5RACE027 chrX 122819904</a><br><a href="#">122819944</a> | STAG2        | RP11-517O1.1  | UGL23a02    | DQ655921 | RP11-517O1.1-002  | 2ab | 41   | extension of the first exon       | Coding     | No                                |                                             | no                       |
| <a href="#">5RACE027 chrX 122819904</a><br><a href="#">122819944</a> | STAG2        | RP11-517O1.1  | UGL23e02    | DQ655922 | RP11-517O1.1-006  | 2ab | 41   | extension of the first exon       | Coding     | No                                |                                             | no                       |
| <a href="#">5RACE145 chr5 131919535</a><br><a href="#">131919635</a> | RAD50        | AC004041.1    | UGL7g06     | DQ655924 | AC004041.1-006    | 2a  | 994  | New exons upstream (not chimeric) | Coding     | No                                |                                             | yes, not coding          |
| <a href="#">5RACE018 chr1 147983375</a><br><a href="#">147983547</a> | PIP5K1A      | RP11-68I18.9  | UGL018-A-G2 | DQ656041 | RP11-68I18.9-011  | 2ab | 725  | New exons upstream (not chimeric) | Coding     | Yes (new ATG upstream)            | New M (ATG) upstream                        | yes, partly coding (ATG) |
| <a href="#">5RACE145 chr5 131919940</a><br><a href="#">131919961</a> | RAD50        | AC004041.1    | UGL7g07     | DQ655928 | AC004041.1-006    | 2b  | 589  | New exons upstream (not chimeric) | Coding     | Yes (ATG downstream: shorter CDS) |                                             | no                       |
| <a href="#">5RACE290 chr7 126825724</a><br><a href="#">126825744</a> | FSCN3        | AC073934.3    | UGL15a05    | DQ655929 | AC073934.3-005    | 3   | 1916 | New exons upstream (not chimeric) | Not coding | No                                | Skipping of the exon containing the M (ATG) | yes, not coding          |
| <a href="#">5RACE183 chr21 33107870</a><br><a href="#">33107935</a>  | C21orf62     | AP000280.67   | UGLsupplC   | DQ656042 | AP000280.67-001   | 2ab | 66   | extension of the first exon       | Coding     | No                                |                                             | no                       |
| <a href="#">5RACE261 chr7 26987975</a><br><a href="#">26988041</a>   | HOXA9        | AC004080.4    | UGL14a03    | DQ655931 | AC004080.4-006    | 3   | 4684 | New exons upstream (not chimeric) | Not coding | No                                | Skipping of the exon containing the M (ATG) | yes, not coding          |
| <a href="#">5RACE185 chr21 33775307</a><br><a href="#">33775371</a>  | C21orf4      | AP000300.7    | UGL10a02    | DQ655932 | AP000300.7-010    | 1   | 1216 | New exons upstream (not chimeric) | Coding     | No                                |                                             | yes, not coding          |
| <a href="#">5RACE290 chr7 126825405</a><br><a href="#">126825453</a> | FSCN3        | AC073934.3    | UGL22a07    | DQ655934 | AC073934.3-005    | 1   | 2235 | chimeric                          | Not coding | No                                | Skipping of the exon containing the M (ATG) | yes, not coding          |
| <a href="#">5RACE023 chr1 148067170</a><br><a href="#">148067191</a> | RP11-126K1.3 | RP11-126K1.3  | UGL1d08     | DQ655935 | RP11-126K1.3-004  | 2b  | 646  | New exons upstream (not chimeric) | Coding     | No                                | New M (ATG) upstream                        | yes, not coding          |
| <a href="#">5RACE185 chr21 33774156</a><br><a href="#">33774188</a>  | C21orf4      | AP000300.7    | UGLsupplD   | DQ656043 | AP000300.7-001    | 2ab | 33   | extension of the first exon       | Coding     | No                                |                                             | no                       |
| <a href="#">5RACE073 chr22 30216509</a><br><a href="#">30216653</a>  | EIF4ENIF1    | RP11-247I13.2 | UGL073-A-G6 | DQ656044 | RP11-247I13.2-008 | 1   | 6289 | New exons upstream (not chimeric) | Coding     | No                                |                                             | yes, not coding          |

|                                                   |            |               |             |          |                   |     |       |                                   |            |    |                                                             |                 |
|---------------------------------------------------|------------|---------------|-------------|----------|-------------------|-----|-------|-----------------------------------|------------|----|-------------------------------------------------------------|-----------------|
| <a href="#">5RACE292 chr7 126665891_126665935</a> | AC000123.1 | AC000123.1    | UGL15b06    | DQ655936 | AC000123.1-008    | 3   | 39212 | New exons upstream (not chimeric) | Coding     | No |                                                             | yes, not coding |
| <a href="#">5RACE004 chr1 148296037_148296096</a> | CGN        | RP11-74C1.3   | UGL004-A-B1 | DQ656045 | RP11-74C1.3-005   | 2a  | 909   | New exons upstream (not chimeric) | Coding     | No |                                                             | yes, not coding |
| <a href="#">5RACE073 chr22 30210448_30210475</a>  | EIF4ENIF1  | RP11-247I13.2 | UGL2a12     | DQ655937 | RP11-247I13.2-009 | 2ab | 111   | New exons upstream (not chimeric) | Coding     | No | New M (ATG) upstream (entirely open)                        | yes, not coding |
| <a href="#">5RACE004 chr1 148296464_148296527</a> | CGN        | RP11-74C1.3   | UGL004-A-C1 | DQ656046 | RP11-74C1.3-006   | 2b  | 482   | New exons upstream (not chimeric) | Coding     | No | New M (ATG) upstream (entirely open)                        | yes, not coding |
| <a href="#">5RACE028 chr1 147980842_147980907</a> | TCFL1      | RP11-68I18.8  | UGLsuplA    | DQ656047 | RP11-68I18.8-004  | 1   | 5168  | New exons upstream (not chimeric) | Not coding | No | Skipping of the exon containing the M (ATG)(entirely open)  | yes, not coding |
| <a href="#">5RACE074 chr22 30382940_30382976</a>  | PISD       | RP5-858B16.2  | UGL3a01     | DQ655940 | RP5-858B16.2-001  | 2a  | 196   | extension of the first exon       | Coding     | No |                                                             | no              |
| <a href="#">5RACE028 chr1 147975740_147975772</a> | TCFL1      | RP11-68I18.8  | UGL1a11     | DQ655941 | RP11-68I18.8-001  | 2ab | 33    | extension of the first exon       | Coding     | No |                                                             | no              |
| <a href="#">5RACE074 chr22 30382781_30382823</a>  | PISD       | RP5-858B16.2  | UGL074-A-H6 | DQ656048 | RP5-858B16.2-001  | 2b  | 43    | extension of the first exon       | Coding     | No |                                                             | no              |
| <a href="#">5RACE112 chrX 152883245_152883267</a> | MECP2      | AF030876.1    | UGL112-B-D5 | DQ656049 | AF030876.1-006    | 4   | 0     | intronic                          | Not coding | No |                                                             | yes, not coding |
| <a href="#">5RACE055 chr20 33725862_33725884</a>  | CPNE1      | RP1-309K20.2  | UGL055-A-E5 | DQ656050 | RP1-309K20.2-029  | 1   | 9592  | chimeric                          | Not coding | No |                                                             | no              |
| <a href="#">5RACE112 chrX 152923396_152923422</a> | MECP2      | AF030876.1    | UGL112-B-E5 | DQ656051 | AF030876.1-007    | 1   | 39363 | New exons upstream (not chimeric) | Not coding | No | Skipping of the exon containing the M (ATG) (entirely open) | yes, not coding |
| <a href="#">5RACE227 chr19 59573942_59573977</a>  | LAIR1      | AC008746.1    | UGL12d04    | DQ655942 | AC008746.1-005    | 2b  | 36    | extension of the first exon       | Coding     | No |                                                             | no              |
| <a href="#">5RACE055 chr20 33725711_33725737</a>  | CPNE1      | RP1-309K20.2  | UGL2a06     | DQ655943 | RP1-309K20.2-031  | 3   | 9445  | chimeric                          | Not coding | No | Skipping of the exon containing the M (ATG)                 | no              |
| <a href="#">5RACE055 chr20 33725711_33725737</a>  | CPNE1      | RP1-309K20.2  | UGL2d06     | DQ655945 | RP1-309K20.2-029  | 3   | 9445  | chimeric                          | Not coding | No |                                                             | no              |

|                                                   |           |                 |             |          |                     |     |       |                                                      |            |                                          |                                             |                               |
|---------------------------------------------------|-----------|-----------------|-------------|----------|---------------------|-----|-------|------------------------------------------------------|------------|------------------------------------------|---------------------------------------------|-------------------------------|
| <a href="#">5RACE055 chr20 33725711_33725737</a>  | CPNE1     | RP1-309K20.2    | UGL2e06     | DQ655946 | RP1-309K20.2-030    | 3   | 9445  | chimeric                                             | Not coding | No                                       | Skipping of the exon containing the M (ATG) | no                            |
| <a href="#">5RACE083 chr22 31778284_31778399</a>  | SYN3      | LL22NC03-28H9.1 | UGL3c10     | DQ655947 | LL22NC03-28H9.1-009 | 4   | 0     | intronic                                             | Coding     | No                                       |                                             | yes, not coding               |
| <a href="#">5RACE241 chr16 386727_386755</a>      | NME4      | Z97634.4        | UGL12a10    | DQ655948 | Z97634.4-002        | 2ab | 29    | extension of the first exon                          | Not coding | No                                       |                                             | no                            |
| <a href="#">5RACE201 chr19 59618039_59618247</a>  | TTYH1     | AC008746.2      | UGL10d04    | DQ655949 | AC008746.2-010      | 2ab | 378   | New exons upstream (not chimeric)                    | Coding     | Yes (new ATG upstream)                   | Skipping of the exon containing the M (ATG) | yes, partly coding (ATG)      |
| <a href="#">5RACE062 chr20 33792299_33792321</a>  | RNPC2     | RP11-353C18.2   | UGL062-A-H5 | DQ656052 | RP11-353C18.2-038   | 4   | 0     | intronic                                             | Not coding | No                                       | New M (ATG) upstream (entirely open)        | no (extends an existing exon) |
| <a href="#">5RACE069 chr22 30763573_30763634</a>  | SLC5A1    | RP1-127L4.1     | UGL069-A-E6 | DQ656053 | RP1-127L4.1-001     | 2ab | 62    | extension of the first exon                          | Coding     | No                                       |                                             | no                            |
| <a href="#">5RACE372 chr7 116699774_116699815</a> | CFTR      | AC000061.1      | UGLsupplH   | DQ656054 | AC000061.1-003      | 2ab | 14194 | New exons upstream (not chimeric)                    | Not coding | No                                       |                                             | yes, not coding               |
| <a href="#">5RACE005 chr9 128951111_128951115</a> | CRAT      | RP11-247A12.5   | UGL1c02     | DQ655951 | RP11-247A12.5-009   | 4   | 0     | intronic                                             | Not coding | No                                       |                                             | no                            |
| <a href="#">5RACE302 chr18 59778397_59778482</a>  | SERPINB8  | AC009802.3      | UGL302-E-B6 | DQ656055 | AC009802.2-002      | 1   | 9742  | chimeric (already annotated from the locus upstream) | Not coding | No                                       |                                             | no                            |
| <a href="#">5RACE012 chr9 128783287_128783347</a> | NUP188    | RP11-167N5.2    | UGL012-A-B2 | DQ656056 | RP11-167N5.2-009    | 1   | 6245  | chimeric                                             | Coding     | Yes (links CDS of the two adjacent loci) | continuous ORF (entirely open)              | no                            |
| <a href="#">5RACE334 chr15 41747163_41747188</a>  | CATSPER2  | AC011330.3      | UGL17a09    | DQ655952 | AC011330.3-012      | 4   | 0     | intronic                                             | Not coding | No                                       |                                             | yes, not coding               |
| <a href="#">5RACE012 chr9 128789806_128790202</a> | NUP188    | RP11-167N5.2    | UGL012-A-C2 | DQ656057 | RP11-167N5.2-010    | 4   | 0     | intronic                                             | Not coding | No                                       | New exon inside the CDS part                | yes, not coding               |
| <a href="#">5RACE297 chr18 59465796_59465822</a>  | SERPINB11 | AC069356.3      | UGLsupplF   | DQ656058 | AC069356.3-003      | 1   | 62612 | New exons upstream (not chimeric)                    | Not coding | No                                       |                                             | yes, not coding               |
| <a href="#">5RACE207 chr19 59833688_59833727</a>  | LILRB1    | AC009892.6      | UGL10e08    | DQ655953 | AC009892.6-001      | 4   | 0     | intronic                                             | Coding     | No                                       | New M (ATG) upstream                        | no (extends an existing exon) |

|                                                   |                |                |             |          |                    |     |       |                                   |            |                                          |                                                                           |                 |
|---------------------------------------------------|----------------|----------------|-------------|----------|--------------------|-----|-------|-----------------------------------|------------|------------------------------------------|---------------------------------------------------------------------------|-----------------|
| <a href="#">5RACE299 chr18 59689889_59689930</a>  | SERPINB2       | AC072051.2     | UGL15a11    | DQ655954 | AC072051.2-005     | 1   | 16025 | New exons upstream (not chimeric) | Coding     | No                                       |                                                                           | yes, not coding |
| <a href="#">5RACE370 chr7 116045050_116045099</a> | CAPZA2         | AC002543.1     | UGL19a07    | DQ655955 | AC002543.1-009     | 1   | 51467 | New exons upstream (not chimeric) | Not coding | No                                       | Skipping of the exon containing the M (ATG)(entirely open)                | yes, not coding |
| <a href="#">5RACE370 chr7 116045050_116045099</a> | CAPZA2         | AC002543.1     | UGL19f07    | DQ655956 | AC002543.1-010     | 1   | 51467 | New exons upstream (not chimeric) | Not coding | No                                       | Skipping of the exon containing the M (ATG)                               | yes, not coding |
| <a href="#">5RACE095 chrX 153234089_153234161</a> | XX-FW81657B9.1 | XX-FW81657B9.1 | UGL4b09     | DQ655957 | XX-FW81657B9.1-009 | 2ab | 73    | extension of the first exon       | Not coding | No                                       |                                                                           | no              |
| <a href="#">5RACE299 chr18 59708066_59708087</a>  | SERPINB2       | AC072051.2     | UGL299-E-A6 | DQ656059 | AC072051.2-005     | 4   | 0     | intronic                          | Coding     | No                                       |                                                                           | yes, not coding |
| <a href="#">5RACE173 chr21 33542890_33542928</a>  | IL10RB         | AP000295.8     | UGL9b05     | DQ655960 | AP000295.8-006     | 2a  | 17643 | chimeric                          | Coding     | Yes (links CDS of the two adjacent loci) | continuous ORF (entirely open)                                            | no              |
| <a href="#">5RACE173 chr21 33542890_33542928</a>  | IL10RB         | AP000295.8     | UGL9d05     | DQ655961 | AP000295.8-007     | 2a  | 17643 | chimeric                          | Not coding | No                                       | Skipping of the exon containing the M (ATG)                               | no              |
| <a href="#">5RACE287 chr7 89837715_89837806</a>   | PFTK1          | AC084381.2     | UGL15a02    | DQ655962 | AC084381.2-008     | 2b  | 32747 | New exons upstream (not chimeric) | Not coding | No                                       | Skipping of the exon containing the M (ATG)                               | yes, not coding |
| <a href="#">5RACE287 chr7 89837715_89837806</a>   | PFTK1          | AC084381.2     | UGL15b02    | DQ655963 | AC084381.2-007     | 2b  | 32747 | chimeric                          | Not coding | No                                       | Skipping of the exon containing the M (ATG)                               | no              |
| <a href="#">5RACE287 chr7 89837715_89837806</a>   | PFTK1          | AC084381.2     | UGL15d02    | DQ655964 | AC084381.2-009     | 2b  | 32747 | New exons upstream (not chimeric) | Not coding | No                                       | Skipping of the exon containing the M (ATG)                               | yes, not coding |
| <a href="#">5RACE287 chr7 89837715_89837806</a>   | PFTK1          | AC084381.2     | UGL15e02    | DQ655965 | AC084381.2-010     | 2b  | 32747 | New exons upstream (not chimeric) | Not coding | No                                       | Skipping of the exon containing the M (ATG)                               | yes, not coding |
| <a href="#">5RACE287 chr7 89837715_89837806</a>   | PFTK1          | AC084381.2     | UGL15f02    | DQ655966 | AC084381.2-011     | 2b  | 32747 | New exons upstream (not chimeric) | Not coding | No                                       | New exon inside the CDS part, Skipping of the exon containing the M (ATG) | yes, not coding |

|                                                   |            |               |              |          |                   |     |        |                                   |            |                        |                                                             |                                                       |
|---------------------------------------------------|------------|---------------|--------------|----------|-------------------|-----|--------|-----------------------------------|------------|------------------------|-------------------------------------------------------------|-------------------------------------------------------|
| <a href="#">5RACE422_chr2_234466320_234466396</a> | AC006985.5 | AC006985.5    | UGL20a03     | DQ655967 | AC006985.5-007    | 1   | 2580   | New exons upstream (not chimeric) | Not coding | No                     | Skipping of the exon containing the M (ATG) (entirely open) | yes, not coding                                       |
| <a href="#">5RACE422_chr2_234466320_234466396</a> | AC006985.5 | AC006985.5    | UGL20c03     | DQ655968 | AC006985.5-006    | 1   | 2580   | New exons upstream (not chimeric) | Not coding | No                     | Skipping of the exon containing the M (ATG)                 | yes, not coding                                       |
| <a href="#">5RACE422_chr2_234466320_234466396</a> | AC006985.5 | AC006985.5    | UGL20g03     | DQ655969 | AC006985.5-008    | 1   | 2580   | New exons upstream (not chimeric) | Not coding | No                     | Skipping of the exon containing the M (ATG)                 | yes, not coding                                       |
| <a href="#">5RACE287_chr7_89740378_89740436</a>   | PFTK1      | AC084381.2    | UGL287-E-D4  | DQ656060 | AC084381.2-007    | 2a  | 130084 | chimeric                          | Not coding | No                     | Skipping of the exon containing the M (ATG)                 | yes, not coding (intervening exon between the 2 loci) |
| <a href="#">5RACE174_chr21_33618563_33618802</a>  | IFNAR1     | AP000298.3    | UGL9a08      | DQ655972 | AP000298.3-002    | 2ab | 516    | New exons upstream (not chimeric) | Not coding | No                     | Skipping of the exon containing the M (ATG)                 | yes, not coding                                       |
| <a href="#">5RACE155_chr5_131907481_131907503</a> | IL5        | AC116366.2    | UGL8e03      | DQ655974 | AC116366.2-003    | 2ab | 390    | extension of the first exon       | Not coding | No                     |                                                             | no                                                    |
| <a href="#">5RACE283_chr7_89489182_89489284</a>   | STEAP2     | AC002064.1    | UGLsupplE    | DQ656061 | AC002064.1-008    | 4   | 0      | intronic                          | Not coding | No                     |                                                             | no (extends an existing exon)                         |
| <a href="#">5RACE283_chr7_89441551_89441572</a>   | STEAP2     | AC002064.1    | UGL283-E-A4  | DQ656062 | AC002064.1-009    | 1   | 44100  | New exons upstream (not chimeric) | Coding     | Yes (new ATG upstream) | New M (ATG) upstream                                        | yes, partly coding (ATG)                              |
| <a href="#">5RACE126_chrX_153543534_153543572</a> | GAB3       | CTD-2173L12.1 | UGL126-B-H6  | DQ656063 | CTD-2173L12.1-003 | 2ab | 52     | extension of the first exon       | Not coding | No                     | Skipping of the exon containing the M (ATG)                 | yes, not coding                                       |
| <a href="#">5RACE294_chr2_118288445_118288510</a> | DDX18      | AC009404.1    | Affy08248B12 | DQ655975 | AC009404.1-001    | 1   | 66     | extension of the first exon       | Coding     | No                     |                                                             | no                                                    |
| <a href="#">5RACE294_chr2_118288865_118288887</a> | DDX18      | AC009404.1    | Affy08254D01 | DQ655976 | AC009404.1-006    | 4   | 0      | intronic                          | Not coding | No                     | New exon inside the CDS part                                | yes, not coding                                       |
| <a href="#">5RACE175_chr21_33679163_33679252</a>  | IFNGR2     | AP000300.6    | Affy08254E03 | DQ655977 | AP000300.6-006    | 3   | 17909  | New exons upstream (not chimeric) | Not coding | No                     |                                                             | yes, not coding                                       |
| <a href="#">5RACE245_chr16_42113_42151</a>        | POLR3K     | Z69719.1      | Affy08248B08 | DQ655978 | Z69719.1-002      | 4   | 0      | intronic                          | Not coding | No                     |                                                             | no (extends an existing exon)                         |
| <a href="#">5RACE152_chr5_131375690_131375772</a> | ACSL6      | AC034228.1    | Affy08246A12 | DQ655980 | AC034228.1-016    | 2b  | 94     | New exons upstream (not chimeric) | Coding     | No                     |                                                             | yes, not coding                                       |



|                                                   |           |               |              |          |                   |     |       |                                   |            |                                          |                                             |                 |
|---------------------------------------------------|-----------|---------------|--------------|----------|-------------------|-----|-------|-----------------------------------|------------|------------------------------------------|---------------------------------------------|-----------------|
| <a href="#">5RACE152 chr5 131375690_131375772</a> | ACSL6     | AC034228.1    | Affy08246F12 | DQ655981 | AC034228.1-017    | 2b  | 94    | New exons upstream (not chimeric) | Coding     | No                                       |                                             | yes, not coding |
| <a href="#">5RACE409 chr11 5213134_5213197</a>    | HBD       | AC104389.18   | Affy08244A08 | DQ655982 | AC104389.18-004   | 3   | 743   | New exons upstream (not chimeric) | Coding     | No                                       |                                             | yes, not coding |
| <a href="#">5RACE408 chr11 5207176_5207199</a>    | HBB       | AC104389.17   | Affy08250G03 | DQ655985 | AC104389.17-004   | 3   | 2196  | New exons upstream (not chimeric) | Coding     | No                                       |                                             | yes, not coding |
| <a href="#">5RACE259 chr7 26965357_26965495</a>   | HOXA6     | AC004080.2    | Affy08242H09 | DQ655986 | AC004080.2-004    | 2ab | 1659  | New exons upstream (not chimeric) | Not coding | No                                       | Skipping of the exon containing the M (ATG) | yes, not coding |
| <a href="#">5RACE006 chr9 128922932_128922935</a> | DOLPP1    | RP11-167N5.4  | Affy08254D10 | DQ655991 | RP11-167N5.4-001  | 2b  | 4     | extension of the first exon       | Coding     | No                                       |                                             | no              |
| <a href="#">5RACE286 chr7 89657716_89657716</a>   | CLDN12    | AC006153.2    | Affy08254F11 | DQ655993 | AC006153.2-014    | 1   | 19724 | chimeric                          | Not coding | No                                       |                                             | no              |
| <a href="#">5RACE286 chr7 89657716_89657716</a>   | CLDN12    | AC006153.2    | Affy08254G11 | DQ655994 | AC006153.2-015    | 1   | 19724 | chimeric                          | Not coding | No                                       |                                             | no              |
| <a href="#">5RACE286 chr7 89677341_89677398</a>   | CLDN12    | AC006153.2    | Affy08242E11 | DQ655995 | AC006153.2-001    | 2ab | 58    | extension of the first exon       | Coding     | No                                       |                                             | no              |
| <a href="#">5RACE300 chr18 59715383_59715425</a>  | SERPINB10 | AC009802.1    | Affy08246B09 | DQ655996 | AC009802.1-002    | 1   | 5338  | chimeric                          | Coding     | Yes (links CDS of the two adjacent loci) | continuous ORF (entirely open)              | no              |
| <a href="#">5RACE300 chr18 59715383_59715425</a>  | SERPINB10 | AC009802.1    | Affy08246G09 | DQ655997 | AC009802.1-003    | 1   | 5338  | chimeric                          | Coding     | Yes (links CDS of the two adjacent loci) | continuous ORF (entirely open)              | no              |
| <a href="#">5RACE300 chr18 59720027_59720048</a>  | SERPINB10 | AC009802.1    | Affy08246E10 | DQ655998 | AC009802.1-003    | 3   | 694   | chimeric                          | Coding     | Yes (links CDS of the two adjacent loci) | continuous ORF (entirely open)              | no              |
| <a href="#">5RACE300 chr18 59720027_59720048</a>  | SERPINB10 | AC009802.1    | Affy08246F10 | DQ655999 | AC009802.1-002    | 3   | 694   | chimeric                          | Coding     | Yes (links CDS of the two adjacent loci) | continuous ORF (entirely open)              | no              |
| <a href="#">5RACE239 chr16 258721_258773</a>      | ARHGDIG   | LA16c-314G4.1 | Affy08250B05 | DQ656000 | LA16c-314G4.1-005 | 2a  | 11730 | chimeric                          | Coding     | Yes (links CDS of the two adjacent loci) | continuous ORF (entirely open)              | no              |
| <a href="#">5RACE239 chr16 258721_258773</a>      | ARHGDIG   | LA16c-314G4.1 | Affy08250F05 | DQ656001 | LA16c-314G4.1-006 | 2a  | 11730 | chimeric                          | Coding     | Yes (links CDS of the two adjacent loci) | continuous ORF (entirely open)              | no              |

|                                                   |             |             |              |          |                 |   |        |                                   |            |                        |                                                             |                          |
|---------------------------------------------------|-------------|-------------|--------------|----------|-----------------|---|--------|-----------------------------------|------------|------------------------|-------------------------------------------------------------|--------------------------|
|                                                   |             |             |              |          |                 |   |        |                                   |            | loci)                  |                                                             |                          |
| <a href="#">5RACE203_chr19_59700906_59701072</a>  | LAIR2       | AC008746.8  | Affy08256A02 | DQ656002 | AC008746.8-003  | 1 | 4919   | New exons upstream (not chimeric) | Coding     | Yes (new ATG upstream) | Skipping of the exon containing the M (ATG)                 | yes, partly coding (ATG) |
| <a href="#">5RACE203_chr19_59700906_59701072</a>  | LAIR2       | AC008746.8  | Affy08256C02 | DQ656003 | AC008746.8-004  | 1 | 4919   | New exons upstream (not chimeric) | Coding     | Yes (new ATG upstream) | Skipping of the exon containing the M (ATG)                 | yes, partly coding (ATG) |
| <a href="#">5RACE323_chr5_56303234_56303255</a>   | AC008937.5  | AC008937.5  | Affy08256B03 | DQ656004 | AC008937.5-011  | 1 | 19480  | New exons upstream (not chimeric) | Not coding | No                     | Skipping of the exon containing the M (ATG)                 | yes, not coding          |
| <a href="#">5RACE323_chr5_56303234_56303255</a>   | AC008937.5  | AC008937.5  | Affy08256D03 | DQ656005 | AC008937.5-009  | 1 | 19480  | New exons upstream (not chimeric) | Not coding | No                     | Skipping of the exon containing the M (ATG)                 | yes, not coding          |
| <a href="#">5RACE323_chr5_56303234_56303255</a>   | AC008937.5  | AC008937.5  | Affy08256F03 | DQ656006 | AC008937.5-010  | 1 | 19480  | New exons upstream (not chimeric) | Not coding | No                     | Skipping of the exon containing the M (ATG) (entirely open) | yes, not coding          |
| <a href="#">5RACE404_chr11_5102288_5102328</a>    | AC113331.10 | AC113331.10 | Affy08256A04 | DQ656008 | AC113331.10-002 | 1 | 2944   | New exons upstream (not chimeric) | Not coding | No                     |                                                             | yes, not coding          |
| <a href="#">5RACE404_chr11_5102288_5102328</a>    | AC113331.10 | AC113331.10 | Affy08256B04 | DQ656009 | AC113331.10-003 | 1 | 2944   | New exons upstream (not chimeric) | Not coding | No                     |                                                             | yes, not coding          |
| <a href="#">5RACE367_chr7_115522073_115522115</a> | CAV2        | AC006159.1  | Affy08256G06 | DQ656013 | AC006159.1-007  | 1 | 211174 | New exons upstream (not chimeric) | Not coding | No                     | Skipping of the exon containing the M (ATG)                 | yes, not coding          |
| <a href="#">5RACE367_chr7_115522073_115522115</a> | CAV2        | AC006159.1  | 5A05         | EF070113 | AC006159.1-008  | 1 | 211174 | New exons upstream (not chimeric) | Not coding | No                     |                                                             | yes, not coding          |
| <a href="#">5RACE367_chr7_115522073_115522115</a> | CAV2        | AC006159.1  | 5A06         | EF070114 | AC006159.1-009  | 1 | 211174 | New exons upstream (not chimeric) | Not coding | No                     |                                                             | yes, not coding          |
| <a href="#">5RACE367_chr7_115522073_115522115</a> | CAV2        | AC006159.1  | 5A08         | EF070115 | AC006159.1-010  | 1 | 211174 | New exons upstream (not chimeric) | Not coding | No                     |                                                             | yes, not coding          |
| <a href="#">5RACE367_chr7_115522073_115522115</a> | CAV2        | AC006159.1  | 5B05         | EF070116 | AC006159.1-011  | 1 | 211174 | New exons upstream (not chimeric) | Not coding | No                     | Skipping of the exon containing the M (ATG)                 | yes, not coding          |
| <a href="#">5RACE367_chr7_115522073_115522115</a> | CAV2        | AC006159.1  | 5C05         | EF070117 | AC006159.1-012  | 1 | 211174 | New exons upstream (not chimeric) | Not coding | No                     | Skipping of the exon containing the M (ATG)                 | yes, not coding          |

|                                                   |       |               |              |          |                   |     |        |                                   |            |                                   |                                             |                               |
|---------------------------------------------------|-------|---------------|--------------|----------|-------------------|-----|--------|-----------------------------------|------------|-----------------------------------|---------------------------------------------|-------------------------------|
| <a href="#">5RACE367 chr7 115522073_115522115</a> | CAV2  | AC006159.1    | 5C07         | EF070118 | AC006159.1-013    | 1   | 211174 | New exons upstream (not chimeric) | Not coding | No                                | Skipping of the exon containing the M (ATG) | yes, not coding               |
| <a href="#">5RACE367 chr7 115522073_115522115</a> | CAV2  | AC006159.1    | 5D05         | EF070119 | AC006159.1-014    | 1   | 211174 | New exons upstream (not chimeric) | Not coding | No                                | Skipping of the exon containing the M (ATG) | yes, not coding               |
| <a href="#">5RACE367 chr7 115522073_115522115</a> | CAV2  | AC006159.1    | 5D07         | EF070120 | AC006159.1-015    | 1   | 211174 | New exons upstream (not chimeric) | Not coding | No                                |                                             | yes, not coding               |
| <a href="#">5RACE367 chr7 115522073_115522115</a> | CAV2  | AC006159.1    | 5E05         | EF070121 | AC006159.1-016    | 1   | 211174 | New exons upstream (not chimeric) | Not coding | No                                | Skipping of the exon containing the M (ATG) | yes, not coding               |
| <a href="#">5RACE367 chr7 115522073_115522115</a> | CAV2  | AC006159.1    | 5E06         | EF070122 | AC006159.1-017    | 1   | 211174 | New exons upstream (not chimeric) | Not coding | No                                | Skipping of the exon containing the M (ATG) | yes, not coding               |
| <a href="#">5RACE367 chr7 115523874_115523910</a> | CAV2  | AC006159.1    | Affy08256B07 | DQ656015 | AC006159.1-007    | 3   | 209373 | New exons upstream (not chimeric) | Not coding | No                                | Skipping of the exon containing the M (ATG) | yes, not coding               |
| <a href="#">5RACE367 chr7 115523874_115523910</a> | CAV2  | AC006159.1    | Affy08256F07 | DQ656017 | AC006159.1-006    | 3   | 209373 | New exons upstream (not chimeric) | Not coding | No                                |                                             | yes, not coding               |
| <a href="#">5RACE367 chr7 115523874_115523910</a> | CAV2  | AC006159.1    | Affy3F10-1   | DQ656068 | AC006159.1-004    | 3   | 209373 | New exons upstream (not chimeric) | Not coding | No                                | New exon inside the CDS part                | yes, not coding               |
| <a href="#">5RACE367 chr7 115523874_115523910</a> | CAV2  | AC006159.1    | Affy3F10-7   | DQ656069 | AC006159.1-005    | 3   | 209373 | New exons upstream (not chimeric) | Not coding | No                                |                                             | yes, not coding               |
| <a href="#">5RACE411 chr11 5623571_5623597</a>    | HBG2  | AC104389.21   | Affy2H6-2    | DQ656066 | AC104389.21-001   | 3   | 140186 | chimeric                          | Coding     | No                                |                                             | yes, not coding               |
| <a href="#">5RACE007 chr6 41645877_41645938</a>   | FOXP4 | RP11-328M4.1  | Affy08256A09 | DQ656018 | RP11-328M4.1-004  | 4   | 0      | intronic                          | Not coding | No                                | New exon inside the CDS part                | yes, not coding               |
| <a href="#">5RACE374 chr7 116662093_116662131</a> | ASZ1  | AC002465.3    | Affy08256D10 | DQ656019 | AC002465.3-005    | 1   | 619    | New exons upstream (not chimeric) | Coding     | Yes (ATG downstream: shorter CDS) | Skipping of the exon containing the M (ATG) | no                            |
| <a href="#">5RACE374 chr7 116661513_116661518</a> | ASZ1  | AC002465.3    | Affy08256A11 | DQ656020 | AC002465.3-001    | 3   | 6      | extension of the first exon       | Coding     | No                                |                                             | no                            |
| <a href="#">5RACE190 chr21 34209825_34209901</a>  | ATP5O | AP000313.5    | Affy08250G07 | DQ656023 | AP000313.5-007    | 4   | 0      | intronic                          | Not coding | No                                | New exon inside the CDS part                | no (extends exon into intron) |
| <a href="#">5RACE014 chr6 41829745_41829856</a>   | PGC   | RP11-298J23.1 | Affy08256B12 | DQ656024 | RP11-298J23.1-004 | 2ab | 6743   | New exons upstream (not chimeric) | Coding     | Yes (new ATG upstream)            | Skipping of the exon containing the M (ATG) | yes, partly coding (ATG)      |

|                                                  |            |              |              |          |                  |    |        |                                   |            |                                          |                                                                                            |                               |
|--------------------------------------------------|------------|--------------|--------------|----------|------------------|----|--------|-----------------------------------|------------|------------------------------------------|--------------------------------------------------------------------------------------------|-------------------------------|
| <a href="#">5RACE188 chr21 34206481_34206506</a> | DONSON     | AP000304.9   | Affy08248B10 | DQ656027 | AP000304.11-012  | 1  | 316865 | chimeric                          | Coding     | Yes (links CDS of the two adjacent loci) | Skipping of the M (entirely open), Chimeric transcript with continuous ORF (entirely open) | no                            |
| <a href="#">5RACE285 chr7 89614334_89614360</a>  | AC006153.3 | AC006153.3   | Affy08258B04 | DQ656028 | AC006153.3-007   | 3  | 6266   | New exons upstream (not chimeric) | Not coding | No                                       | Skipping of the exon containing the M (ATG)                                                | yes, not coding               |
| <a href="#">5RACE285 chr7 89614334_89614360</a>  | AC006153.3 | AC006153.3   | Affy08258C04 | DQ656029 | AC006153.3-008   | 3  | 6266   | New exons upstream (not chimeric) | Not coding | No                                       | Skipping of the exon containing the M (ATG)                                                | yes, not coding               |
| <a href="#">5RACE285 chr7 89614334_89614360</a>  | AC006153.3 | AC006153.3   | Affy08258D04 | DQ656030 | AC006153.3-010   | 3  | 6266   | New exons upstream (not chimeric) | Not coding | No                                       | Skipping of the exon containing the M (ATG)                                                | yes, not coding               |
| <a href="#">5RACE285 chr7 89614334_89614360</a>  | AC006153.3 | AC006153.3   | Affy08258H04 | DQ656031 | AC006153.3-009   | 3  | 6266   | New exons upstream (not chimeric) | Not coding | No                                       | Skipping of the exon containing the M (ATG)                                                | yes, not coding               |
| <a href="#">5RACE393 chr11 5685993_5686053</a>   | OR56B1     | AC131574.4   | Affy08250A12 | DQ656032 | AC131574.4-003   | 2a | 28330  | chimeric                          | Not coding | No                                       |                                                                                            | yes, not coding               |
| <a href="#">5RACE393 chr11 5685993_5686053</a>   | OR56B1     | AC131574.4   | Affy08250B12 | DQ656033 | AC131574.4-002   | 2a | 28330  | chimeric                          | Not coding | No                                       |                                                                                            | yes, not coding               |
| <a href="#">5RACE011 chr6 41411364_41411474</a>  | NCR2       | RP1-149M18.2 | Affy08252A03 | DQ656036 | RP1-149M18.2-001 | 1  | 141    | extension of the first exon       | Coding     | No                                       | New M (ATG) upstream                                                                       | no                            |
| <a href="#">5RACE133 chr6 74228516_74228563</a>  | MTO1       | RP11-505P4.1 | Affy08242A03 | DQ656037 | RP11-505P4.1-011 | 4  | 0      | intronic                          | Coding     | No                                       |                                                                                            | no (extends an existing exon) |
| <a href="#">5RACE202 chr19 59652582_59652671</a> | LENG8      | AC008746.4   | Affy08258B01 | DQ656038 | AC008746.4-003   | 4  | 0      | extension of the first exon       | Coding     | No                                       | New M (ATG) upstream (entirely open)                                                       | no                            |

Table S3 : Probe intensities from RNA hybridization in 4 sets of RACEfrag

| tissue          | Type of RACEfrag | Average intensity of all probes | Average intensity of positive probes | Median intensity of all probes | Median intensity of positive probes | % of positive probes |
|-----------------|------------------|---------------------------------|--------------------------------------|--------------------------------|-------------------------------------|----------------------|
| Brain           | exonic           | 9.88                            | 16.08                                | 2                              | 6.3                                 | 58.9%                |
| Brain           | Novel intronic   | 2.93                            | 7.49                                 | 1                              | 3                                   | 29.7%                |
| Brain           | Novel external   | 7.83                            | 16.83                                | 1                              | 6.5                                 | 43.4%                |
| Brain           | chimeric         | 18.05                           | 21.90                                | 8                              | 11                                  | 81.6%                |
| Kidney          | exonic           | 19.38                           | 30.10                                | 3                              | 8                                   | 63.2%                |
| Kidney          | Novel intronic   | 2.60                            | 5.89                                 | 1                              | 3                                   | 32.7%                |
| Kidney          | Novel external   | 9.37                            | 20.96                                | 1                              | 5                                   | 41.9%                |
| Kidney          | chimeric         | 34.40                           | 41.48                                | 11                             | 16.65                               | 82.5%                |
| Small intestine | exonic           | 12.07                           | 19.47                                | 2.3                            | 6                                   | 59.9%                |
| Small intestine | Novel intronic   | 2.48                            | 5.79                                 | 1                              | 3.3                                 | 30.9%                |
| Small intestine | Novel external   | 12.21                           | 28.36                                | 1                              | 9.3                                 | 41.0%                |
| Small intestine | chimeric         | 29.90                           | 35.58                                | 9.4                            | 12.73                               | 83.6%                |
| Colon           | exonic           | 16.14                           | 25.17                                | 3                              | 7.3                                 | 62.6%                |
| Colon           | Novel intronic   | 3.03                            | 8.25                                 | 1                              | 3                                   | 27.9%                |
| Colon           | Novel external   | 11.28                           | 25.84                                | 1                              | 4                                   | 41.4%                |
| Colon           | chimeric         | 98.85                           | 110.37                               | 24                             | 28.85                               | 89.5%                |
| Liver           | exonic           | 20.90                           | 32.33                                | 3                              | 7                                   | 63.5%                |
| Liver           | Novel intronic   | 4.06                            | 9.32                                 | 1                              | 3                                   | 36.8%                |
| Liver           | Novel external   | 23.29                           | 37.15                                | 3                              | 8.075                               | 61.7%                |
| Liver           | chimeric         | 70.84                           | 79.72                                | 27.4                           | 37                                  | 88.7%                |
| Stomach         | exonic           | 11.82                           | 20.24                                | 2                              | 5.3                                 | 56.2%                |
| Stomach         | Novel intronic   | 2.47                            | 5.74                                 | 1                              | 3                                   | 31.0%                |
| Stomach         | Novel external   | 15.32                           | 31.73                                | 1                              | 9                                   | 46.6%                |
| Stomach         | chimeric         | 58.17                           | 78.91                                | 5.5                            | 10.85                               | 73.4%                |

## Supplementary Figures

### **Supplementary Figure S1:** *Portion of novel exons covered by RACEfrags*

Comparison of the lengths of the sequenced novel exons (horizontal axis) and the length of the portion of these exons covered by RACEfrags (vertical axis). Each point represents one sequenced exon.

# Coverage of the sequenced exons by RACE frags

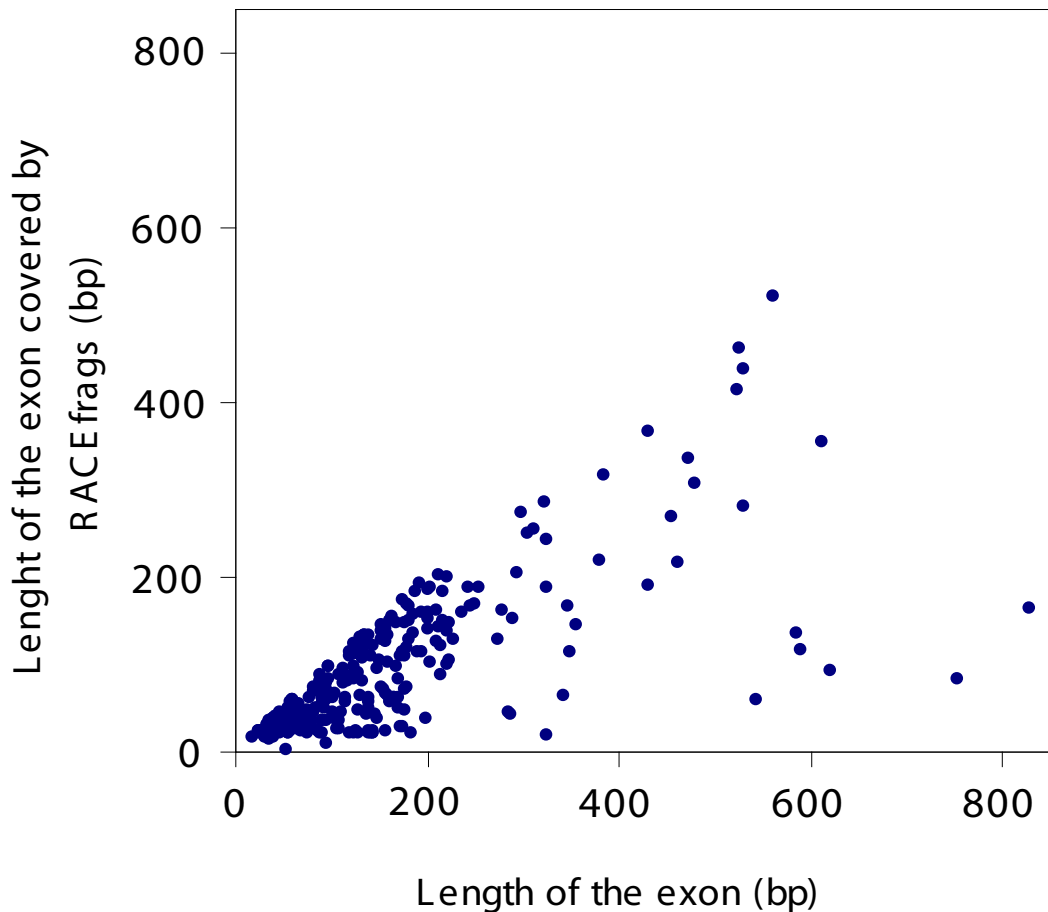

**Supplementary Figure S2:**

Distribution of RACEfrags tested by RT-PCR (positive reactions in blue, negative reactions in grey) according to the intensity signals measured on probes overlapping the regions where they map, in six tissues. Intensity values are represented on the X-axis. Values of 1 mean no signal (ratio of 1 compared to control) : positive probes are probes with intensity  $> 1$ . The-axis shows the % of RACEfrags in each intensity bin on the left, and the success rate of the RT-PCR reactions on the right.



## RT-PCR success rate in function of expression level on tiling arrays

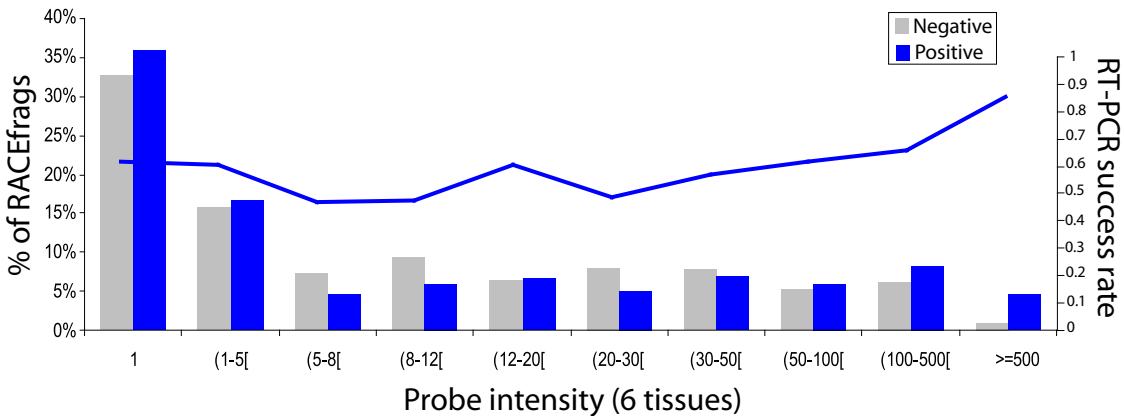

**Supplementary Figure S3:** *Characteristics of the novel exons*

Distributions of exon lengths (A) and GC contents (B) of novel exons identified by RACE/array (dark grey columns) and annotated by GENCODE (light grey columns) (Harrow et al. 2006).

# A

## Exon length distribution (internal exons)

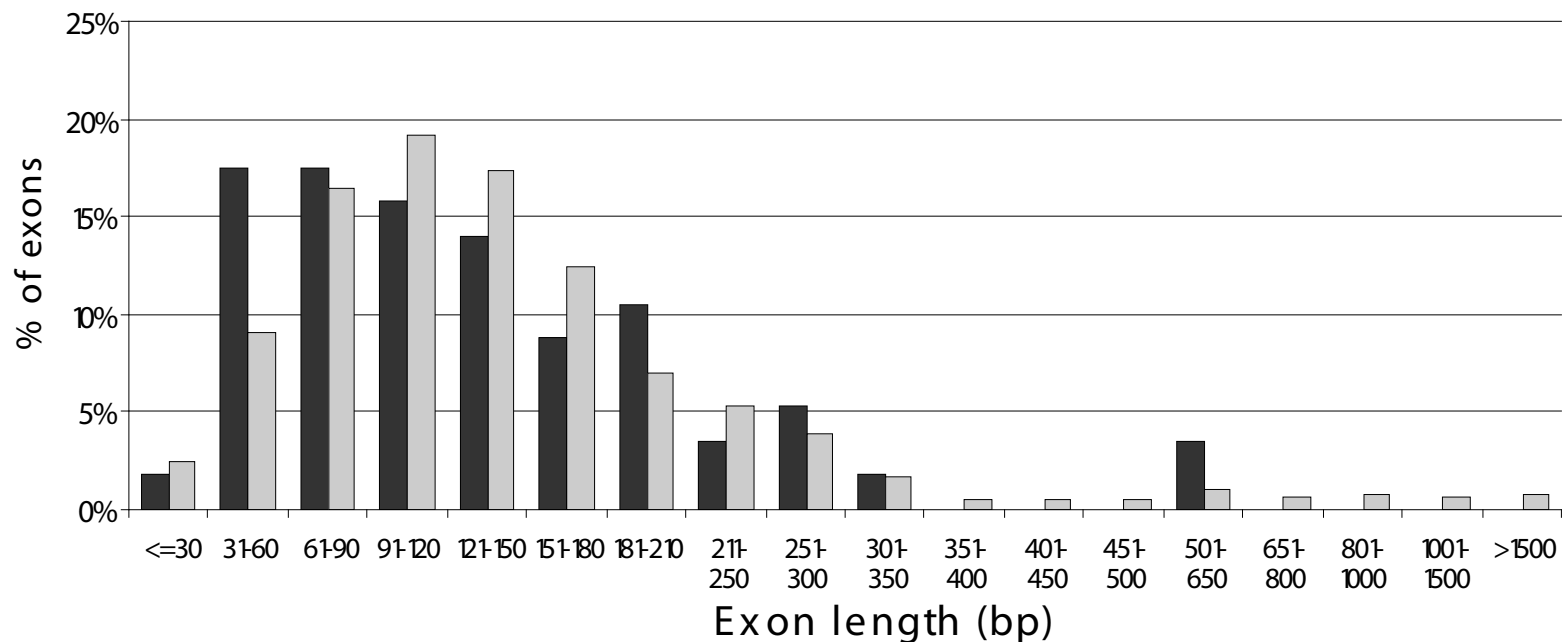

# B

## GC content

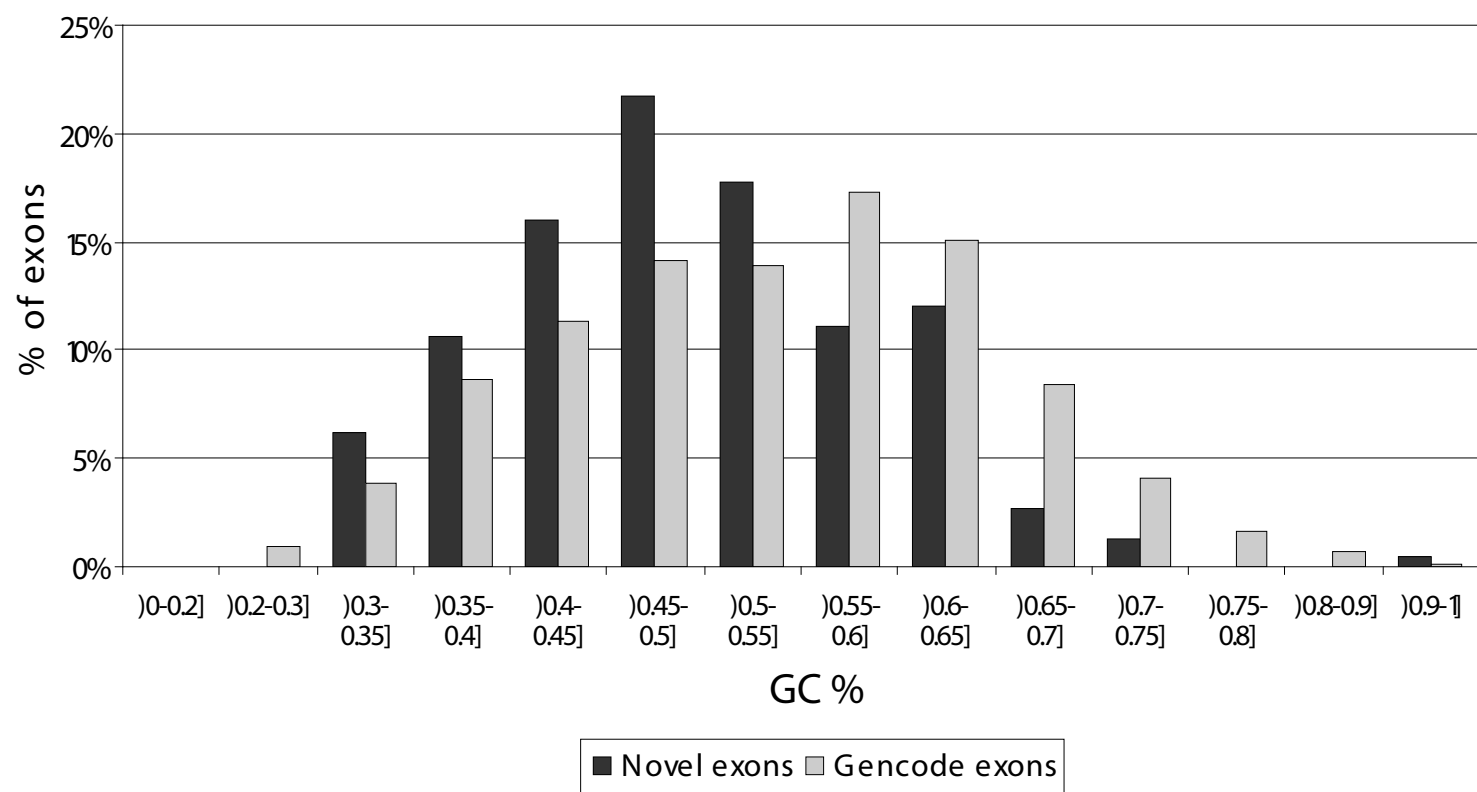

**Supplementary Figure S4:** *Splice site strength of novel exons*

Boxplots representing the distribution of log-odds scores for donor and acceptor sites as reported by GeneID are shown for each dataset. False splice sites were picked at random from the set of all GT or AG dinucleotides in ENCODE regions which do not overlap GENCODE-annotated exons or repeats. The heavy black line marks the median score, the box contains the 2<sup>nd</sup> and 3<sup>rd</sup> quartiles and whiskers mark the 5<sup>th</sup> and 95<sup>th</sup> percentiles.

# Splice site strength

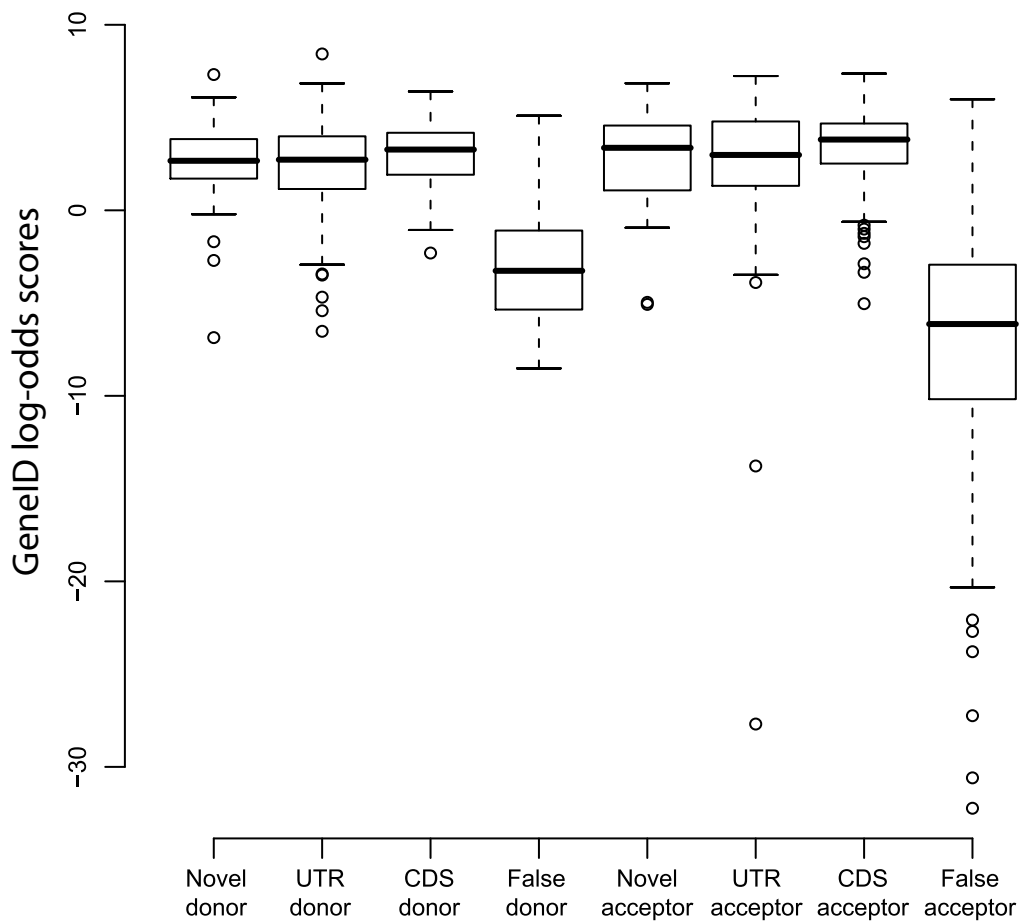

Supplement: Denoeud-2006-supplement.pdf [file Denoeud-2006-supplement.pdf]
